# Supplementary material for: Combinatorial Approaches for Cancer Treatment Using Oncolytic Viruses: Projecting the Perspectives through Clinical Trials Outcomes
Source: MDPI journal article supplement (doi:10.3390/v13071271), 2021-06-29
Supplement: s1 [file s1]

Table S1.

| Virus      | Oncolytic virus variant                                                               | Payload                                          | Monotherapy / Combination | Combo agent 1     | Combo agent 2 | Combo agent 3  | Type of Cancer                                                                                                                                            | Patients (n) | Phase (1, 1/2, 2, 3) | Route          | Clinical trial (ID)           | Reference                                                               |
|------------|---------------------------------------------------------------------------------------|--------------------------------------------------|---------------------------|-------------------|---------------|----------------|-----------------------------------------------------------------------------------------------------------------------------------------------------------|--------------|----------------------|----------------|-------------------------------|-------------------------------------------------------------------------|
| Adenovirus | TG1042 (Ad-IFN-gamma)                                                                 | IFN-gamma                                        | Mono                      | NO                | NO            | NO             | Cutaneous T cell lymphoma                                                                                                                                 | 13           | 2                    | IT             | NCT00394693                   | doi.org/10.1371/journal.pone.0083670                                    |
| Adenovirus | Ad5/3-D24-GMCSF (CGTG-102)                                                            | GM-CSF                                           | Mono                      | NO                | NO            | NO             | Soft-tissue sarcoma (STS) or primary bone sarcoma                                                                                                         | 15           | 1/2                  | IT             | N/A                           | doi.org/10.1002/jjc.28696                                               |
| Adenovirus | rAd-p53 (Gendicine)                                                                   | p53                                              | Combo                     | Radiotherapy      | NO            | NO             | Hepatocellular carcinoma                                                                                                                                  | 40           | N/A                  | IT             | N/A                           | doi.org/10.1007/s00432-009-0701-6                                       |
| Adenovirus | rAd-p53 (Gendicine)                                                                   | p53                                              | Combo                     | Chemotherapy      | NO            | NO             | Stage III or IV oral carcinoma who had refused or were ineligible                                                                                         | 99           | 3                    | Intra-arterial | ChiCTR-TRC-09000392           | doi.org/10.1186/1741-7015-12-16 ChiCTR-TRC-09000392                     |
| Adenovirus | rAd-p53 (Gendicine)                                                                   | p53                                              | Combo                     | Chemotherapy      | NO            | NO             | Locally advanced cervical cancer (LACC)                                                                                                                   | 40           | N/A                  | IT             | N/A                           | doi.org/10.3892/ol.2017.5901                                            |
| Adenovirus | rAd-p53 (Gendicine)                                                                   | p53                                              | Combo                     | Chemotherapy      | NO            | NO             | Malignant pleural effusion induced by lung cancer                                                                                                         | 35           | N/A                  | IT             | N/A                           | doi.org/10.5732/cjc.009.10149                                           |
| Adenovirus | rAd-p53 (Gendicine)                                                                   | p53                                              | Combo                     | Surgery           | NO            | NO             | Laryngeal cancer                                                                                                                                          | 12           | 1                    | IT             | N/A                           | PMID: 14703409                                                          |
| Adenovirus | rAd-p53 (Gendicine)                                                                   | p53                                              | Combo                     | Radiotherapy      | NO            | NO             | Head and neck squamous cell carcinoma                                                                                                                     | 36           | N/A                  | IT             | N/A                           | PMID: 16188130                                                          |
| Adenovirus | rAd-p53 (Gendicine)                                                                   | p53                                              | Combo                     | Radiotherapy      | NO            | NO             | Nasopharyngeal carcinoma                                                                                                                                  | 29           | 2                    | IT             | N/A                           | PMID: 14703410                                                          |
| Adenovirus | rAd-p53 (Gendicine)                                                                   | p53                                              | Combo                     | Radiotherapy      | NO            | NO             | Head and neck squamous cell carcinoma                                                                                                                     | 42           | 2                    | IT             | N/A                           | PMID: 14703408                                                          |
| Adenovirus | rAd-p53 (Gendicine)                                                                   | p53                                              | Combo                     | Surgery           | NO            | NO             | Recurrent malignant gliomas                                                                                                                               | 38           | N/A                  | IT             | N/A                           | PMID: 21122390                                                          |
| Adenovirus | rAd-p53 (Gendicine)                                                                   | p53                                              | Combo                     | Chemotherapy      | NO            | NO             | Recurrent nasopharyngeal carcinoma                                                                                                                        | 162          | 1                    | IT             | N/A                           | doi.org/10.1097/CAD.0000000000000448                                    |
| Adenovirus | Human adenovirus type 5                                                               | NO                                               | Combo                     | Chemotherapy      | NO            | NO             | Unresectable hepatocellular carcinoma                                                                                                                     | 266          | 3                    | Intra-arterial | NCT01869088                   | doi.org/10.1007/s12032-014-0095-4                                       |
| Adenovirus | OBP-401                                                                               | TERT promoter + EIA and EIB                      | Mono                      | NO                | NO            | NO             | Newly diagnosed esophageal, stomach, colon, liver, pancreatic, prostate, endometrial or cervical cancer without preoperative chemotherapy or radiotherapy | 86           | Observational        | NA             | NCT04064515                   | doi.org/10.3892/or.2014.3436                                            |
| Adenovirus | Human adenovirus type 5 Sitimagene ceradenovec                                        | CD/HSV-1 TK                                      | Combo                     | Chemotherapy      | Ganciclovir   | NO             | Operable high-grade primary or recurrent glioma                                                                                                           | 250          | 3                    | IT             | EudraCT Number 2004-000464-28 | doi.org/10.1016/S1470-2045(13)70274-2                                   |
| Adenovirus | VB-111                                                                                | Fas-c + PPE-1 promoter                           | Combo                     | Chemotherapy      | NO            | NO             | Platinum-resistant ovarian cancer                                                                                                                         | 21           | 1/2                  | IV             | NCT01711970                   | doi.org/10.1177/1947601912437933<br>doi.org/10.1016/j.ygyno.2020.02.034 |
| Adenovirus | Human adenovirus type 5 (Telomelysin)                                                 | hTERT                                            | Mono                      | NO                | NO            | NO             | Advanced Solid Tumors                                                                                                                                     | 16           | 1                    | IT             | N/A                           | doi.org/10.1038/mt.2009.262                                             |
| Adenovirus | ICOVIR-7                                                                              | NO                                               | Mono                      | NO                | NO            | NO             | Advanced and refractory solid tumors                                                                                                                      | 21           | N/A                  | NA             | N/A                           | doi.org/10.1158/1078-0432.CCR-09-3167                                   |
| Adenovirus | Ad5/3-D24-GMCSF (CGTG-102)                                                            | GM-CSF                                           | Mono                      | NO                | NO            | NO             | Advanced cancer                                                                                                                                           | 60           | N/A                  | NA             | N/A                           | doi.org/10.1158/1078-0432.CCR-12-2546                                   |
| Adenovirus | Ad5/ 3-E2F-Δ24-GMCSF (CGTG-602)                                                       | GM-CSF + E2F1                                    | Combo                     | Chemotherapy      | NO            | NO             | Advanced metastatic tumors - Ovarian Rectum Colon Pancreatic Melanoma Breast Sarcoma Fibrosarcoma cancer                                                  | 13           | 1                    | IT             | N/A                           | doi.org/10.18632/oncotarget.2901                                        |
| Adenovirus | Enadenotucirev (ColoAd1) Ad11p/Ad3 chimera                                            | NO                                               | Mono                      | NO                | NO            | NO             | Colorectal cancer , NSCLC, urothelial cell cancer, renal cell cancer                                                                                      | 17           | 1                    | IT             | NCT02053220                   | doi.org/10.1186/s40425-017-0277-7                                       |
| Adenovirus | Enadenotucirev (ColoAd1) Ad11p/Ad3 chimera                                            | NO                                               | Mono                      | NO                | NO            | NO             | Solid tumors of Epithelial Origin, Metastatic colorectal cancer                                                                                           | 61           | 1/2                  | IV             | NCT02028442                   | doi.org/10.1186/s40425-019-0510-7                                       |
| Adenovirus | Enadenotucirev (ColoAd1) Ad11p/Ad3 chimera                                            | NO                                               | Combo                     | Chemoradiotherapy | NO            | NO             | Locally advanced rectal cancer                                                                                                                            | 30           | 1                    | IV             | NCT03916510                   | doi.org/10.1186/s13014-020-01593-5                                      |
| Adenovirus | DNX-2401 (Delta-24-RGD) RGD motif + E1A 24bp deletion                                 | NO                                               | Mono                      | NO                | NO            | NO             | Diffuse intrinsic pontine glioma                                                                                                                          | 1            | 1                    | IT             | EudraCT: 2016-001577-33       | doi.org/10.3389/fonc.2018.00061<br>doi.org/10.1093/neuros/nys507        |
| Adenovirus | DNX-2401 (Delta-24-RGD) RGD motif + E1A 24bp deletion                                 | NO                                               | Combo                     | Chemotherapy      | NO            | NO             | Brain cancer                                                                                                                                              | 37           | 1                    | IT             | NCT00805376                   | doi.org/10.1200/JCO.2017.75.8219                                        |
| Adenovirus | Autologous MSCs Carrying the Oncolytic Virus Icovir-5 (Celyvir) d-DM-E2F-K-Delta24RGD | NO                                               | Combo                     | Autologous MSC    | NO            | NO             | Solid tumors                                                                                                                                              | 20           | 1                    | IV             | NCT01844661                   | doi.org/10.1016/j.ymthe.2020.01.019                                     |
| Adenovirus | Ad5-CD/TKrep                                                                          | CD/HSV-1 TK                                      | Combo                     | Chemotherapy      | Radiotherapy  | Valganciclovir | Prostate cancer                                                                                                                                           | 15           | 1                    | IT             | N/A                           | PMID: 14612551                                                          |
| Adenovirus | Ad5-CD/TKrep                                                                          | CD/HSV-1 TK                                      | Mono                      | NO                | NO            | NO             | Prostate cancer                                                                                                                                           | 16           | 1                    | IT             | N/A                           | PMID: 12208748                                                          |
| Adenovirus | Ad5-CD/TKrep                                                                          | CD/HSV-1 TK                                      | Mono                      | NO                | NO            | NO             | Ovarian cancer                                                                                                                                            | 38           | 1                    | Intraleural    | NCT02028117                   | N/A                                                                     |
| Adenovirus | Ad5-CD/TKrep                                                                          | CD/HSV-1 TK                                      | Combo                     | Nivolumab         | NO            | NO             | Colorectal cancer                                                                                                                                         | 135          | 1                    | NA             | NCT02636036                   | N/A                                                                     |
| Poxvirus   | Pexa-Vec (JX-594)                                                                     | GM-CSF + TK-del + lac-Z gene under p7.5 promoter | Mono                      | NO                | NO            | NO             | Neuroblastoma, rhabdomyosarcoma, lymphoma                                                                                                                 | 6            | 1                    | IT             | NCT01169584                   | doi.org/10.1038/mt.2014.243                                             |
| Poxvirus   | Pexa-Vec (JX-594)                                                                     | GM-CSF + TK-del + lac-Z gene under p7.5 promoter | Mono                      | NO                | NO            | NO             | HCC                                                                                                                                                       | 16           | 2                    | IV             | NCT01636284                   | N/A                                                                     |
| Poxvirus   | Pexa-Vec (JX-594)                                                                     | GM-CSF + TK-del + lac-Z gene under p7.5 promoter | Mono                      | NO                | NO            | NO             | Unresectable malignant melanoma                                                                                                                           | 10           | 1/2                  | IT             | NCT00429312                   | N/A                                                                     |
| Poxvirus   | Pexa-Vec (JX-594)                                                                     | GM-CSF + TK-del + lac-Z gene under p7.5 promoter | Combo                     | Chemotherapy      | NO            | NO             | HCC                                                                                                                                                       | 25           | 2                    | IV+IT          | NCT01171651                   | N/A                                                                     |
| Poxvirus   | Pexa-Vec (JX-594)                                                                     | GM-CSF + TK-del + lac-Z gene under p7.5 promoter | Mono                      | NO                | NO            | NO             | HCC                                                                                                                                                       | 129          | 2                    | NA             | NCT01387555                   | N/A                                                                     |

|                      |                                                                                     |                                                  |       |                                           |              |    |                                                                                                       |      |     |              |             |                                                       |
|----------------------|-------------------------------------------------------------------------------------|--------------------------------------------------|-------|-------------------------------------------|--------------|----|-------------------------------------------------------------------------------------------------------|------|-----|--------------|-------------|-------------------------------------------------------|
| Poxvirus             | Pexa-Vec (JX-594)                                                                   | GM-CSF + TK-del + lac-Z gene under p7.5 promoter | Combo | Chemotherapy                              | NO           | NO | Metastatic, refractory colorectal carcinoma                                                           | 52   | 1/2 | IV           | NCT01394939 | N/A                                                   |
| Poxvirus             | Pexa-Vec (JX-594)                                                                   | GM-CSF + TK-del + lac-Z gene under p7.5 promoter | Mono  | NO                                        | NO           | NO | Colorectal Cancer                                                                                     | 15   | 1   | IV           | NCT01380600 | doi.org/10.1038/mt.2015.109                           |
| Poxvirus             | Pexa-Vec (JX-594)                                                                   | GM-CSF + TK-del + lac-Z gene under p7.5 promoter | Mono  | NO                                        | NO           | NO | Refractory primary or metastatic liver cancer - hepatocellular, colorectal, melanoma, and lung cancer | 14   | 1   | TD           | NCT00629759 | doi.org/10.1016/S14702045(08)70107-4                  |
| Poxvirus             | Pexa-Vec (JX-594)                                                                   | GM-CSF + TK-del + lac-Z gene under p7.5 promoter | Mono  | NO                                        | NO           | NO | Refractory Solid Tumors                                                                               | 23   | 1   | IV           | NCT00625456 | N/A                                                   |
| Poxvirus             | Pexa-Vec (JX-594)                                                                   | GM-CSF + TK-del + lac-Z gene under p7.5 promoter | Combo | Chemotherapy                              | Avelumab     | NO | Solid Tumors                                                                                          | 197  | 1/2 | IV           | NCT02630368 | N/A                                                   |
| Poxvirus             | Pexa-Vec (JX-594)                                                                   | GM-CSF + TK-del + lac-Z gene under p7.5 promoter | Mono  | NO                                        | NO           | NO | Colorectal carcinoma                                                                                  | 2    | 2   | IV           | NCT01329809 | N/A                                                   |
| Poxvirus             | Pexa-Vec (JX-594)                                                                   | GM-CSF + TK-del + lac-Z gene under p7.5 promoter | Mono  | NO                                        | NO           | NO | Unresectable primary HCC                                                                              | 30   | 2   | IT           | NCT00554372 | doi.org/10.1007/978-1-4939-2727-2_19, 10.1038/nm.3089 |
| Poxvirus             | Pexa-Vec (JX-594)                                                                   | GM-CSF + TK-del + lac-Z gene under p7.5 promoter | Mono  | NO                                        | NO           | NO | Refractory renal cell carcinoma                                                                       | 17   | 2   | IV           | N/A         | doi.org/10.1200/JCO.2018.36.6_suppl.671               |
| Poxvirus             | Pexa-Vec (JX-594)                                                                   | GM-CSF + TK-del + lac-Z gene under p7.5 promoter | Combo | Nivolumab                                 | NO           | NO | HCC                                                                                                   | 30   | 1/2 | IT           | NCT03071094 | N/A                                                   |
| Poxvirus             | Pexa-Vec (JX-594)                                                                   | GM-CSF + TK-del + lac-Z gene under p7.5 promoter | Combo | ZKAB001 (anti-PD-L1 monoclonal)           | NO           | NO | Local progression or metastatic melanoma with failed first-line treatment                             | 40   | 1/2 | IT           | NCT04849260 | N/A                                                   |
| Poxvirus             | Pexa-Vec (JX-594)                                                                   | GM-CSF + TK-del + lac-Z gene under p7.5 promoter | Combo | Durvalumab                                | Tremelimumab | NO | Colorectal Cancer                                                                                     | 34   | 1/2 | IV           | NCT03206073 | N/A                                                   |
| Poxvirus             | Pexa-Vec (JX-594)                                                                   | GM-CSF + TK-del + lac-Z gene under p7.5 promoter | Combo | Cemiplimab                                | NO           | NO | Renal cell carcinoma                                                                                  | 117  | 1/2 | IV/IT        | NCT03294083 | N/A                                                   |
| Poxvirus             | Pexa-Vec (JX-594)                                                                   | GM-CSF + TK-del + lac-Z gene under p7.5 promoter | Combo | Ipilimumab                                | NO           | NO | Advanced solid tumors                                                                                 | 66   | 1/2 | IT           | NCT02977156 | N/A                                                   |
| Poxvirus             | Pexa-Vec (JX-594)                                                                   | GM-CSF + TK-del + lac-Z gene under p7.5 promoter | Combo | Chemotherapy                              | NO           | NO | HCC                                                                                                   | 459  | 3   | IT           | NCT02562755 | doi.org/10.1200/JCO.2016.34.15_suppl.TPS4146          |
| Poxvirus             | JX-963                                                                              | GM-CSF                                           | Mono  | NO                                        | NO           | NO | Prostate cancer                                                                                       | 83   | 1   | IV           | N/A         | doi.org/10.1172/JCI32727                              |
| Poxvirus             | GL-ONC1 F14.5L, J2R (encoding thymidine kinase) + A56R (encoding hemagglutinin) loc | NO                                               | Combo | Chemotherapy                              | Bevacizumab  | NO | Ovarian cancer, peritoneal carcinomatosis, fallopian tube cancer                                      | 64   | 1/2 | IP           | NCT02759588 | N/A                                                   |
| Poxvirus             | GL-ONC1 F14.5L, J2R (encoding thymidine kinase) + A56R (encoding hemagglutinin) loc | NO                                               | Mono  | NO                                        | NO           | NO | Solid organ cancers                                                                                   | 5    | 1   | IV           | NCT02714374 | N/A                                                   |
| Poxvirus             | GL-ONC1 F14.5L, J2R (encoding thymidine kinase) + A56R (encoding hemagglutinin) loc | NO                                               | Mono  | NO                                        | NO           | NO | Advanced Stage Cancer (Solid tumor disease), AML                                                      | 10   | N/A | NA           | NCT03420430 | N/A                                                   |
| Poxvirus             | GL-ONC1 F14.5L, J2R (encoding thymidine kinase) + A56R (encoding hemagglutinin) loc | NO                                               | Mono  | NO                                        | NO           | NO | Advanced solid tumors                                                                                 | 43   | 1   | IV           | NCT00794131 | N/A                                                   |
| Poxvirus             | GL-ONC1 F14.5L, J2R (encoding thymidine kinase) + A56R (encoding hemagglutinin) loc | NO                                               | Mono  | NO                                        | NO           | NO | Peritoneal carcinomatosis                                                                             | 9    | 1   | IP           | NCT01443260 | doi.org/10.1158/1078-0432.CCR-18-0244                 |
| Poxvirus             | GL-ONC1 F14.5L, J2R (encoding thymidine kinase) + A56R (encoding hemagglutinin) loc | NO                                               | Mono  | NO                                        | NO           | NO | Lung Cancer                                                                                           | 18   | 1   | IT           | NCT01766739 | N/A                                                   |
| Poxvirus             | GL-ONC1 F14.5L, J2R (encoding thymidine kinase) + A56R (encoding hemagglutinin) loc | NO                                               | Combo | Chemotherapy                              | Radiotherapy | NO | HNC, non-metastatic                                                                                   | 19   | 1   | IV           | NCT01584284 | doi.org/10.1158/1078-0432.CCR-16-3232                 |
| Poxvirus             | vvDD (delVGF + TK mutation)                                                         | NO                                               | Mono  | NO                                        | NO           | NO | Advanced solid tumors                                                                                 | 26   | 1   | IV/IT        | NCT00574977 | doi.org/10.1038/mt.2014.194, 10.1038/mt.2016.101      |
| Poxvirus             | vvDD (delVGF + TK mutation)                                                         | NO                                               | Combo | autologous cytokine induced killer cells. | NO           | NO | Advanced solid tumors                                                                                 | 24   | 1   | NA           | NCT04282044 | N/A                                                   |
| Poxvirus             | DryVax                                                                              | NO                                               | Mono  | NO                                        | NO           | NO | Bladder cancer, carcinoma                                                                             | 4    | 1   | Intravesical | N/A         | PMID: 11547060 . J Urol. 2001; 166(4): 1291–1295      |
| Poxvirus             | ACAM2000                                                                            | NO                                               | Mono  | NO                                        | NO           | NO | Advanced solid tumors, AML                                                                            | 26   | 1   | IV/IT        | N/A         | doi.org/10.1200/JCO.2019.37.8_suppl.39                |
| Poxvirus             | PROSTVAC-V/F TRICOM                                                                 | PSA-TRICOM                                       | Combo | GM-CSF                                    | Flutamide    | NO | Prostate cancer                                                                                       | 64   | 2   | SC           | NCT00450463 | N/A                                                   |
| Poxvirus             | PROSTVAC-V/F TRICOM                                                                 | PSA-TRICOM                                       | Combo | GM-CSF                                    | NO           | NO | Prostate cancer                                                                                       | 1297 | 3   | SC           | NCT01322490 | doi.org/10.1200/JCO.18.02031                          |
| Herpes Simplex Virus | T-VEC<br>γ34.5 and α47 deletions                                                    | GM-CSF                                           | Mono  | NO                                        | NO           | NO | Melanoma                                                                                              | 31   | 3   | IT           | NCT01368276 | N/A                                                   |
| Herpes Simplex Virus | T-VEC<br>γ34.5 and α47 deletions                                                    | GM-CSF                                           | Mono  | NO                                        | NO           | NO | Melanoma                                                                                              | 50   | 2   | IT           | NCT00289016 | N/A                                                   |

|                      |                                                             |                                                                             |       |                         |              |    |                                                                              |     |     |                |               |                                                                                                                                                                                                                                                                                                                                         |
|----------------------|-------------------------------------------------------------|-----------------------------------------------------------------------------|-------|-------------------------|--------------|----|------------------------------------------------------------------------------|-----|-----|----------------|---------------|-----------------------------------------------------------------------------------------------------------------------------------------------------------------------------------------------------------------------------------------------------------------------------------------------------------------------------------------|
| Herpes Simplex Virus | T-VEC<br>y34.5 and α47 deletions                            | GM-CSF                                                                      | Mono  | NO                      | NO           | NO | Melanoma                                                                     | 26  | 1   | IT             | N/A           | doi.org/10.1158/1078-0432.CCR-06-0759                                                                                                                                                                                                                                                                                                   |
| Herpes Simplex Virus | T-VEC<br>y34.5 and α47 deletions                            | GM-CSF                                                                      | Mono  | NO                      | NO           | NO | Melanoma                                                                     | 437 | 3   | IT             | NCT00769704   | doi.org/10.1200/JCO.2014.58.3377<br>doi.org/10.1186/s40425-019-0623-z<br>doi.org/10.1186/s40425-017-0276-8<br>doi.org/10.1200/JCO.2017.73.7379<br>doi.org/10.1007/s00262-017-1967-1<br>doi.org/10.1200/JCO.2016.67.1529<br>doi.org/10.1038/s41416-019-0530-6<br>doi.org/10.1007/s00262-017-1967-1<br>doi.org/10.1016/j.cell.2017.08.027 |
| Herpes Simplex Virus | T-VEC<br>y34.5 and α47 deletions                            | GM-CSF                                                                      | Combo | Ipilimumab              | NO           | NO | Melanoma                                                                     | 217 | 1/2 | IT             | NCT01740297   |                                                                                                                                                                                                                                                                                                                                         |
| Herpes Simplex Virus | T-VEC<br>y34.5 and α47 deletions                            | GM-CSF                                                                      | Combo | Pembrolizumab           | NO           | NO | Melanoma                                                                     | 713 | 3   | IT             | NCT02263508   |                                                                                                                                                                                                                                                                                                                                         |
| Herpes Simplex Virus | T-VEC<br>y34.5 and α47 deletions                            | GM-CSF                                                                      | Combo | BRAF and MEK inhibitors | NO           | NO | Melanoma                                                                     | 4   | 1   | IT             | NCT03088176   | N/A                                                                                                                                                                                                                                                                                                                                     |
| Herpes Simplex Virus | T-VEC<br>y34.5 and α47 deletions                            | GM-CSF                                                                      | Combo | Chemotherapy            | NO           | NO | Melanoma                                                                     | 32  | 3   | IT             | NCT02288897   | N/A                                                                                                                                                                                                                                                                                                                                     |
| Herpes Simplex Virus | T-VEC<br>y34.5 and α47 deletions                            | GM-CSF                                                                      | Combo | Radiotherapy            | NO           | NO | Melanoma                                                                     | 19  | 2   | IT             | NCT02819843   | N/A                                                                                                                                                                                                                                                                                                                                     |
| Herpes Simplex Virus | T-VEC<br>y34.5 and α47 deletions                            | GM-CSF                                                                      | Combo | Chemotherapy            | Radiotherapy | NO | Squamous Cell Carcinoma, HNC                                                 | 5   | 3   | IT             | NCT01161498   | N/A                                                                                                                                                                                                                                                                                                                                     |
| Herpes Simplex Virus | T-VEC<br>y34.5 and α47 deletions                            | GM-CSF                                                                      | Mono  | NO                      | NO           | NO | Melanoma                                                                     | 3   | 2   | IT             | NCT02574260   | N/A                                                                                                                                                                                                                                                                                                                                     |
| Herpes Simplex Virus | T-VEC y34.5 and α47 deletions                               | GM-CSF                                                                      | Mono  | NO                      | NO           | NO | Pancreatic cancer                                                            | 17  | 1   | IT             | NCT00402025   | N/A                                                                                                                                                                                                                                                                                                                                     |
| Herpes Simplex Virus | T-VEC<br>y34.5 and α47 deletions                            | GM-CSF                                                                      | Combo | Nivolumab               | NO           | NO | Stage IV metastatic cancer, lung cancer                                      | 1   | 1/2 | IT             | NCT03597009   | N/A                                                                                                                                                                                                                                                                                                                                     |
| Herpes Simplex Virus | T-VEC<br>y34.5 and α47 deletions                            | GM-CSF                                                                      | Combo | Chemotherapy            | NO           | NO | Tripple Negative breast cancer                                               | 50  | 1/2 | IT             | NCT02779855   | N/A                                                                                                                                                                                                                                                                                                                                     |
| Herpes Simplex Virus | T-VEC<br>y34.5 and α47 deletions                            | GM-CSF                                                                      | Mono  | NO                      | NO           | NO | Non-melanoma Skin Cancer, Basal cell Carcinoma, Cutaneous Lymphoma           | 20  | 1   | IT             | NCT03458117   | N/A                                                                                                                                                                                                                                                                                                                                     |
| Herpes Simplex Virus | T-VEC<br>y34.5 and α47 deletions                            | GM-CSF                                                                      | Mono  | NO                      | NO           | NO | Melanoma                                                                     | 61  | 2   | IT             | NCT02014441   | N/A                                                                                                                                                                                                                                                                                                                                     |
| Herpes Simplex Virus | T-VEC<br>y34.5 and α47 deletions                            | GM-CSF                                                                      | Mono  | NO                      | NO           | NO | Malignant Chest Wall Neoplasm, Recurrent Breast Carcinoma                    | 11  | 2   | IT             | NCT02658812   | N/A                                                                                                                                                                                                                                                                                                                                     |
| Herpes Simplex Virus | T-VEC<br>y34.5 and α47 deletions                            | GM-CSF                                                                      | Mono  | Nivolumab               | NO           | NO | Refractory lymphomas or Advanced or refractory Non-melanoma skin cancer      | 68  | 2   | IT             | NCT02978625   | N/A                                                                                                                                                                                                                                                                                                                                     |
| Herpes Simplex Virus | Oncolytic Type 2 Herpes Simplex Virus                       | GM-CSF                                                                      | Combo | Chemotherapy            | HX008        | NO | Solid tumors                                                                 | 300 | 1/2 | IT             | NCT03866525   | doi.org/10.1136/jitc-2020-002224                                                                                                                                                                                                                                                                                                        |
| Herpes Simplex Virus | Oncolytic Type 2 Herpes Simplex Virus                       | GM-CSF                                                                      | Combo | Pembrolizumab           | NO           | NO | Solid tumors                                                                 | 30  | 1/2 | IT             | NCT04386967   | N/A                                                                                                                                                                                                                                                                                                                                     |
| Herpes Simplex Virus | OrienX010                                                   | GM-CSF                                                                      | Mono  | NO                      | NO           | NO | Melanoma                                                                     | 30  | 1   | IT             | NCT03048253   | doi.org/10.1093/annonc/mdx667.001                                                                                                                                                                                                                                                                                                       |
| Herpes Simplex Virus | OrienX010                                                   | GM-CSF                                                                      | Mono  | NO                      | NO           | NO | Melanoma, Liver Cancer, Pancreatic cancer, Lung Cancer                       | 18  | 1   | IT             | NCT01935453   | N/A                                                                                                                                                                                                                                                                                                                                     |
| Herpes Simplex Virus | OrienX010                                                   | GM-CSF                                                                      | Mono  | NO                      | NO           | NO | Melanoma                                                                     | 30  | 1   | IV             | NCT04206358   | N/A                                                                                                                                                                                                                                                                                                                                     |
| Herpes Simplex Virus | NV1020, γ-34.5, ICP0, ICP4, and LAT genes have been deleted | NO                                                                          | Mono  | NO                      | NO           | NO | Colorectal cancer, metastatic cancer                                         | 13  | 1/2 | Intra-arterial | NCT00012155   | doi.org/10.1016/S1525-0016(16)39150-X<br>doi.org/10.1089/hum.2010.020                                                                                                                                                                                                                                                                   |
| Herpes Simplex Virus | ONCR-177                                                    | tissue-specific miRNA, UL37 mutation + IL12, FLT3LG, CCL4, PD-1 and CTLA-4. | Combo | Pembrolizumab           | NO           | NO | Melanoma, Solid Tumors, head and neck squamous cell carcinoma, Breast cancer | 132 | 1   | IT             | NCT04348916   | N/A                                                                                                                                                                                                                                                                                                                                     |
| Herpes Simplex Virus | HF-10 (canerpaturev) attenuated HSV-1                       | NO                                                                          | Mono  | NO                      | NO           | NO | Solid tumors                                                                 | 6   | 1   | IT             | NCT02428036   | N/A                                                                                                                                                                                                                                                                                                                                     |
| Herpes Simplex Virus | HF-10 (canerpaturev) attenuated HSV-1                       | NO                                                                          | Mono  | NO                      | NO           | NO | Solid tumors                                                                 | 28  | 1   | IT             | NCT01017185   | N/A                                                                                                                                                                                                                                                                                                                                     |
| Herpes Simplex Virus | HSV1716, ICP34.5 deletion                                   | NO                                                                          | Mono  | NO                      | NO           | NO | Rhabdomyosarcoma, Osteosarcoma, Ewing Sarcoma, Neuroblastoma                 | 18  | 1   | IV/IT          | NCT00931931   | doi.org/10.1158/1078-0432.CCR-16-2900                                                                                                                                                                                                                                                                                                   |
| Herpes Simplex Virus | HSV1716, ICP34.5 deletion                                   | NO                                                                          | Mono  | NO                      | NO           | NO | Colorectal cancer, Liver Neoplasma                                           | 32  | 1/2 | Intra-arterial | NCT00149396   | N/A                                                                                                                                                                                                                                                                                                                                     |
| Herpes Simplex Virus | HSV1716, ICP34.5 deletion                                   | NO                                                                          | Mono  | NO                      | NO           | NO | Malignant Pleural Mesothelioma                                               | 12  | 1/2 | Intrapleural   | NCT01721018   | N/A                                                                                                                                                                                                                                                                                                                                     |
| Herpes Simplex Virus | G207, HSV-1 mutant R3616 and y34.5 deletion                 | NO                                                                          | Combo | Radiotherapy            | NO           | NO | Glioma, Astrocytoma, Glioblastoma                                            | 65  | 1/2 | IT             | NCT00028158   | N/A                                                                                                                                                                                                                                                                                                                                     |
| Herpes Simplex Virus | G207, HSV-1 mutant R3616 and y34.5 deletion                 | NO                                                                          | Mono  | NO                      | NO           | NO | Malignant glioma                                                             | 9   | 1   | IT             | NCT00157703   | doi.org/10.1038/mt.2014.22                                                                                                                                                                                                                                                                                                              |
| Herpes Simplex Virus | G207, HSV-1 mutant R3616 and y34.5 deletion                 | NO                                                                          | Combo | Radiotherapy            | NO           | NO | Supratentorial Neoplasms, Glioma , Glioblastoma, Astrocytoma                 | 12  | 1   | IT             | NCT02457845   | doi.org/10.1056/NEJMoa2024947                                                                                                                                                                                                                                                                                                           |
| Herpes Simplex Virus | T-VEC<br>y34.5 and α47 deletions                            | GM-CSF                                                                      | Combo | Ipilimumab              | Nivolumab    | NO | Breast Cancer                                                                | 6   | 1   | IT             | NCT04185311   | N/A                                                                                                                                                                                                                                                                                                                                     |
| Herpes Simplex Virus | Oncolytic Type 2 Herpes Simplex Virus                       | GM-CSF                                                                      | Mono  | NO                      | NO           | NO | Pancreatic cancer                                                            | 25  | 1/2 | IT             | NCT04637698   | N/A                                                                                                                                                                                                                                                                                                                                     |
| Herpes Simplex Virus | HSV-1, RP-2-001-18                                          | anti-CTLA-4                                                                 | Combo | Nivolumab               | NO           | NO | Solid Tumors                                                                 | 36  | 1   | IT             | NCT04336241   | N/A                                                                                                                                                                                                                                                                                                                                     |
| Herpes Simplex Virus | HSV-1, RP-1                                                 | GALV-GP R- protein and GM-CSF.                                              | Combo | Cemiplimab              | NO           | NO | Squamous Cell cancer                                                         | 240 | 2   | IT             | NCT04050436   | N/A                                                                                                                                                                                                                                                                                                                                     |
| Herpes Simplex Virus | HSV-1, RP-2-001-18                                          | GALV-GP R- protein and GM-CSF.                                              | Combo | Nivolumab               | NO           | NO | Melanoma, NSCLC, Non-melanoma Skin Cancer                                    | 300 | 2   | IT             | NCT03767348   | doi.org/10.1200/JCO.2020.38.15_suppl.e22050                                                                                                                                                                                                                                                                                             |
| Herpes Simplex Virus | G47D<br>deletion of the α47 gene, y34.5 gene                | NO                                                                          | Mono  | NO                      | NO           | NO | Prostate cancer                                                              | 9   | 1   | NA             | UMIN000010463 | N/A                                                                                                                                                                                                                                                                                                                                     |

|                              |                                                            |                  |       |                 |               |                  |                                                                                                 |     |     |       |                           |                                                             |
|------------------------------|------------------------------------------------------------|------------------|-------|-----------------|---------------|------------------|-------------------------------------------------------------------------------------------------|-----|-----|-------|---------------------------|-------------------------------------------------------------|
| Vesicular Stomatitis virus   | VSV-IFNB -NIS                                              | IFN-beta + hNIS  | Combo | Avelumab        | NO            | NO               | Refractory solid tumours, metastatic colorectal cancer, pheochromocytoma, neuroendocrine tumors | 114 | 1   | IV/IT | NCT02923466               | doi.org/10.1200/JCO.2020.38.15_suppl.3090                   |
| Vesicular Stomatitis virus   | VSV-rIFNB                                                  | IFN-beta + hNIS  | Mono  | NO              | NO            | NO               | Hepatocellular cancer and tumours with metastatic lesions in the liver                          | 17  | 1   | IT    | NCT01628640               | N/A                                                         |
| Vesicular Stomatitis virus   | VSV-IFNB -NIS                                              | IFN-beta + hNIS  | Combo | Pembrolizumab   | NO            | NO               | Solid Tumors, HNSCC, NSCLC                                                                      | 142 | 1/2 | IV    | NCT03647163               | N/A                                                         |
| Vesicular Stomatitis virus   | VSV-IFNbetaTYRP1                                           | IFN-beta + TYRP1 | Mono  | NO              | NO            | NO               | Melanoma                                                                                        | 72  | 1   | IV/IT | NCT03865212               | N/A                                                         |
| Vesicular Stomatitis virus   | VSV-IFNB -NIS                                              | IFN-beta + hNIS  | Combo | Chemotherapy    | NO            | NO               | Recurrent Endometrial Cancer                                                                    | 77  | 1   | IV    | NCT03120624               | doi.org/10.1158/1538-7445.AM2018-CT072                      |
| Vesicular Stomatitis virus   | VSV-IFNB -NIS                                              | IFN-beta + hNIS  | Combo | Chemotherapy    | NO            | NO               | Relapsed or refractory MM, AML, T-cell Lymphoma                                                 | 65  | 1   | IV    | NCT03017820               | https://ash.confex.com/ash/2020/webprogram/Paper140853.html |
| Vesicular Stomatitis virus   | VSV-IFNB -NIS                                              | IFN-beta + hNIS  | Combo | Cemiplimab      | NO            | NO               | Melanoma, HCC, NSCLC, endometrial cancer                                                        | 152 | 2   | IV/IT | NCT04291105               | N/A                                                         |
| Vesicular Stomatitis virus   | VSV-IFNB -NIS                                              | IFN-beta + hNIS  | Combo | 18F-TFB-PET     | NO            | NO               | Myeloma Before MV-NIS Treatment, Endometrial Cancer Before VSV-hINF-NIS Treatment               | 2   | 1   | IV    | NCT03456908               | N/A                                                         |
| Maraba virus (Vesiculovirus) | MG1 Maraba/MAGE-A3                                         | MAGE-A3          | Combo | MAGE-A3 (AdMA3) | NO            | NO               | Incurable MAGE-A3-expressing solid tumours                                                      | 56  | 1   | IV    | NCT02285816               | N/A                                                         |
| Maraba virus (Vesiculovirus) | MG1 Maraba/MAGE-A3                                         | MAGE-A3          | Combo | MAGE-A3 (AdMA3) | Pembrolizumab | NO               | NSCLC                                                                                           | 16  | 1   | IV    | NCT02879760               | N/A                                                         |
| Maraba virus (Vesiculovirus) | MG1-E6E7                                                   | HPV E6 + HPV E7  | Combo | Ad-E6E7         | Atezolizumab  | NO               | HPV Associated Cancers                                                                          | 75  | 1   | IV    | NCT03618953               | N/A                                                         |
| Maraba virus (Vesiculovirus) | MG1 Maraba/MAGE-A3                                         | MAGE-A3          | Combo | MAGE-A3 (AdMA3) | Pembrolizumab | Cyclophosphamide | Previously treated metastatic melanoma or cutaneous squamous cell carcinoma                     | 0   | 1   | IV/IT | NCT03773744               | N/A                                                         |
| Reovirus                     | Reolysin® (pelareorep, Reovirus Serotype-3-dearing Strain) | NO               | Mono  | NO              | NO            | NO               | Sarcoma                                                                                         | 53  | 2   | IV    | NCT00503295               | N/A                                                         |
| Reovirus                     | Reolysin® (pelareorep, Reovirus Serotype-3-dearing Strain) | NO               | Combo | Chemotherapy    | NO            | NO               | Recurrent malignant glioma                                                                      | 18  | 1   | IT    | NCT00528684               | doi.org/10.1038/mt.2014.21                                  |
| Reovirus                     | Reolysin® (pelareorep, Reovirus Serotype-3-dearing Strain) | NO               | Mono  | NO              | NO            | NO               | Fallopian tube carcinoma ovarian carcinoma, primary peritoneal carcinoma                        | 70  | 1   | IV    | NCT00602277               | N/A                                                         |
| Reovirus                     | Reolysin® (pelareorep, Reovirus Serotype-3-dearing Strain) | NO               | Mono  | NO              | NO            | NO               | Metastatic melanoma                                                                             | 23  | 2   | IV    | NCT00651157               | doi.org/10.1038/mt.2012.146                                 |
| Reovirus                     | Reolysin® (pelareorep, Reovirus Serotype-3-dearing Strain) | NO               | Combo | Carboplatin     | Paclitaxel    | NO               | Head and neck cancer                                                                            | 14  | 2   | IV    | NCT00753038               | N/A                                                         |
| Reovirus                     | Reolysin® (pelareorep, Reovirus Serotype-3-dearing Strain) | NO               | Combo | Carboplatin     | Paclitaxel    | NO               | Carcinoma, NSCLC                                                                                | 37  | 2   | IV    | NCT00861627               | N/A                                                         |
| Reovirus                     | Reolysin® (pelareorep, Reovirus Serotype-3-dearing Strain) | NO               | Combo | Carboplatin     | Paclitaxel    | NO               | Metastatic melanoma                                                                             | 14  | 2   | IV    | NCT00984464<br>REO 020    | 10.1038/mt.2012.146 28289863 10.1007/s00280-017-3260-6      |
| Reovirus                     | Reolysin® (pelareorep, Reovirus Serotype-3-dearing Strain) | NO               | Combo | Carboplatin     | Paclitaxel    | NO               | Squamous cell carcinoma of the lung                                                             | 32  | 2   | IV    | NCT00998192               | N/A                                                         |
| Reovirus                     | Reolysin® (pelareorep, Reovirus Serotype-3-dearing Strain) | NO               | Combo | Gemcitabine     | NO            | NO               | Metastatic pancreatic adenocarcinoma                                                            | 34  | 2   | IV    | NCT00998322               | N/A                                                         |
| Reovirus                     | Reolysin® (pelareorep, Reovirus Serotype-3-dearing Strain) | NO               | Combo | Chemotherapy    | NO            | NO               | Carcinoma, squamous cell of the Head and Neck                                                   | 167 | 3   | IV    | NCT01166542               | 10.1586/ecp.12.53                                           |
| Reovirus                     | Reolysin® (pelareorep, Reovirus Serotype-3-dearing Strain) | NO               | Combo | Chemotherapy    | NO            | NO               | Recurrent ovarian, tubal or peritoneal cancer                                                   | 108 | 2   | IV    | NCT01199263               | doi.org/10.1016/j.ygyno.2017.07.135                         |
| Reovirus                     | Reolysin® (pelareorep, Reovirus Serotype-3-dearing Strain) | NO               | Combo | Chemotherapy    | NO            | NO               | Childhood Solid tumor                                                                           | 26  | 1   | IV    | NCT01240538               | N/A                                                         |
| Reovirus                     | Reolysin® (pelareorep, Reovirus Serotype-3-dearing Strain) | NO               | Combo | Chemotherapy    | Bevacizumab   | Leucovorin       | KRAS mutant metastatic colorectal cancer                                                        | 36  | 1   | IV    | NCT01274624               | N/A                                                         |
| Reovirus                     | Reolysin® (pelareorep, Reovirus Serotype-3-dearing Strain) | NO               | Combo | Chemotherapy    | NO            | NO               | Metastatic pancreatic adenocarcinoma                                                            | 73  | 2   | IV    | NCT01280058               | doi.org/10.1038/mt.2016.66                                  |
| Reovirus                     | Reolysin® (pelareorep, Reovirus Serotype-3-dearing Strain) | NO               | Mono  | NO              | NO            | NO               | Relapsed MM                                                                                     | 12  | 1   | IV    | NCT01533194               | doi.org/10.1158/1078-0432.CCR-14-1404                       |
| Reovirus                     | Reolysin® (pelareorep, Reovirus Serotype-3-dearing Strain) | NO               | Combo | Docetaxel       | Prednisone    | NO               | Prostate cancer                                                                                 | 85  | 2   | IV    | NCT01619813               | N/A                                                         |
| Reovirus                     | Reolysin® (pelareorep, Reovirus Serotype-3-dearing Strain) | NO               | Combo | Bevacizumab     | FOLFOLX       | NO               | Metastatic colorectal cancer                                                                    | 109 | 2   | IV    | NCT01622543               | doi.org/10.1016/j.clcc.2018.03.001                          |
| Reovirus                     | Reolysin® (pelareorep, Reovirus Serotype-3-dearing Strain) | NO               | Combo | Chemotherapy    | NO            | NO               | Metastatic breast cancer                                                                        | 81  | 2   | IV    | NCT01656538<br>CTG IND213 | doi.org/10.1007/s10549-017-4538-4                           |
| Reovirus                     | Reolysin® (pelareorep, Reovirus Serotype-3-dearing Strain) | NO               | Combo | Chemotherapy    | NO            | NO               | Advanced or metastatic NSCLC                                                                    | 166 | 2   | IV    | NCT01708993               | doi.org/10.1016/j.lungcan.2018.03.005                       |
| Reovirus                     | Reolysin® (pelareorep, Reovirus Serotype-3-dearing Strain) | NO               | Combo | Carfilzomib     | Dexamethasone | NO               | Refractory MM                                                                                   | 28  | 1   | IV    | NCT02101944               | N/A                                                         |
| Reovirus                     | Reolysin® (pelareorep, Reovirus Serotype-3-dearing Strain) | NO               | Combo | Bortezomib      | Dexamethasone | NO               | Plasma cell myeloma                                                                             | 14  | 1   | IV    | NCT02514382               | N/A                                                         |
| Reovirus                     | Reolysin® (pelareorep, Reovirus Serotype-3-dearing Strain) | NO               | Combo | Chemotherapy    | Pembrolizumab | NO               | Pancreatic ductal adenocarcinoma                                                                | 11  | 1   | IV    | NCT02620423               | doi.org/10.1158/1078-0432.CCR-19-2078                       |
| Reovirus                     | Reolysin® (pelareorep, Reovirus Serotype-3-dearing Strain) | NO               | Combo | Chemotherapy    | NO            | NO               | Refractory MM                                                                                   | 4   | 1   | IV    | NCT03015922               | N/A                                                         |
| Reovirus                     | Reolysin® (pelareorep, Reovirus Serotype-3-dearing Strain) | NO               | Combo | Nivolumab       | Carfilzomib   | Dexamethasone    | Recurrent plasma cell myeloma                                                                   | 62  | 1   | IV    | NCT03605719               | N/A                                                         |
| Reovirus                     | Reolysin® (pelareorep, Reovirus Serotype-3-dearing Strain) | NO               | Combo | Pembrolizumab   | NO            | NO               | Pancreatic adenocarcinoma                                                                       | 17  | 2   | IV    | NCT03723915               | N/A                                                         |
| Reovirus                     | Reolysin® (pelareorep, Reovirus Serotype-3-dearing Strain) | NO               | Combo | Trastuzumab     | Atezolizumab  | Letrozole        | Breast cancer                                                                                   | 38  | 1   | IV    | NCT04102618               | N/A                                                         |

|             |                                                            |    |       |               |              |    |                                                                                                                                                                                         |     |     |              |             |                                                                                |
|-------------|------------------------------------------------------------|----|-------|---------------|--------------|----|-----------------------------------------------------------------------------------------------------------------------------------------------------------------------------------------|-----|-----|--------------|-------------|--------------------------------------------------------------------------------|
| Reovirus    | Reolysin® (pelareorep, Reovirus Serotype-3-dearing Strain) | NO | Combo | Avelumab      | Paclitaxel   | NO | Breast cancer                                                                                                                                                                           | 48  | 2   | IV           | NCT04215146 | N/A                                                                            |
| Reovirus    | Reolysin® (pelareorep, Reovirus Serotype-3-dearing Strain) | NO | Mono  | NO            | NO           | NO | Breast cancer                                                                                                                                                                           | 25  | 2   | IV           | NCT04445844 | N/A                                                                            |
| Reovirus    | Reolysin® (pelareorep, Reovirus Serotype-3-dearing Strain) | NO | Combo | GM-CSF        | NO           | NO | Brain tumors (glioma)                                                                                                                                                                   | 6   | 1   | IV           | NCT02444546 | N/A                                                                            |
| Reovirus    | Reolysin® (pelareorep, Reovirus Serotype-3-dearing Strain) | NO | Mono  | NO            | NO           | NO | Brain tumors (malignant gliomas)                                                                                                                                                        | 12  | 1/2 | IT           | N/A         | doi.org/10.1038/sj.mt.6300403                                                  |
| Reovirus    | Reolysin® (pelareorep, Reovirus Serotype-3-dearing Strain) | NO | Mono  | NO            | NO           | NO | Solid tumors                                                                                                                                                                            | 19  | 1   | IT           | REO-001     | doi.org/10.1007/s10637-012-9865-z                                              |
| Reovirus    | Reolysin® (pelareorep, Reovirus Serotype-3-dearing Strain) | NO | Combo | Chemotherapy  | NO           | NO | Advanced or metastatic solid tumors refractory to standard of care treatment                                                                                                            | 25  | 1   | IV           | REO-010     | doi.org/10.1158/1078-0432.CCR-10-1233                                          |
| Reovirus    | Reolysin® (pelareorep, Reovirus Serotype-3-dearing Strain) | NO | Combo | Chemotherapy  | NO           | NO | NSCLC, Colorectal, Breast, Cervical, Squamous cell carcinoma, Undifferentiated carcinoma, Poorly differentiated carcinoma, Cholangiocarcinoma, Oesophageal adenocarcinoma, Fibrosarcoma | 16  | 1   | IV           | N/A         | doi.org/10.1158/1078-0432.CCR-10-2159                                          |
| Reovirus    | Reolysin® (pelareorep, Reovirus Serotype-3-dearing Strain) | NO | Mono  | NO            | NO           | NO | Advanced solid tumors                                                                                                                                                                   | 18  | 1   | IV           | N/A         | doi.org/10.1007/s10637-009-9279-8                                              |
| Reovirus    | Reolysin® (pelareorep, Reovirus Serotype-3-dearing Strain) | NO | Combo | Radiotherapy  | NO           | NO | Solid tumors                                                                                                                                                                            | 23  | 1   | IT           | N/A         | doi.org/10.1158/1078-0432.CCR-10-0054<br>doi.org/10.1016/j.cytogfr.2010.02.006 |
| Reovirus    | Reolysin® (pelareorep, Reovirus Serotype-3-dearing Strain) | NO | Combo | Chemotherapy  | NO           | NO | Extra-cranial solid tumors, refractory solid tumors                                                                                                                                     | 29  | 1   | IV           | N/A         | doi.org/10.1002/ptc.25464                                                      |
| Reovirus    | Reolysin® (pelareorep, Reovirus Serotype-3-dearing Strain) | NO | Combo | Chemotherapy  | NO           | NO | SCCHN, HNC, melanoma, gynecologic cancer                                                                                                                                                | 31  | 1/2 | IV           | N/A         | doi.org/10.1158/1078-0432.CCR-11-2181                                          |
| Reovirus    | Reolysin® (pelareorep, Reovirus Serotype-3-dearing Strain) | NO | Combo | Chemotherapy  | Radiotherapy | NO | Head and neck, prostate, colorectal, pancreas, melanoma, soft-tissue sarcoma, bladder cancer, NSCLC, renal cancer, endometrial cancer                                                   | 33  | 1   | IV           | N/A         | doi.org/10.1158/1078-0432.CCR-08-0524                                          |
| Reovirus    | Reolysin® (pelareorep, Reovirus Serotype-3-dearing Strain) | NO | Combo | Chemotherapy  | NO           | NO | Solid tumors                                                                                                                                                                            | 36  | 1   | IV           | N/A         | doi.org/10.1158/1078-0432.CCR-14-1770                                          |
| Enterovirus | Coxsackie Virus A21, CAVATAK, CAV21, V937                  | NO | Combo | Pembrolizumab | NO           | NO | Melanoma                                                                                                                                                                                | 36  | 1   | IT           | NCT02565992 | N/A                                                                            |
| Enterovirus | Coxsackie Virus A21, CAVATAK, CAV21, V937                  | NO | Combo | Mitomycin C   | NO           | NO | Non-muscle invasive bladder cancer                                                                                                                                                      | 16  | 1   | Intravesical | NCT02316171 | PMID: 31273010<br>doi.org/10.1158/1078-0432.CCR-18-4022                        |
| Enterovirus | Coxsackie Virus A21, CAVATAK, CAV21, V937                  | NO | Combo | Ipilimumab    | NO           | NO | Melanoma                                                                                                                                                                                | 50  | 1   | IT           | NCT02307149 | https://www.medpagetoday.com/reading-room/asco/melanoma/66052                  |
| Enterovirus | Coxsackie Virus A21, CAVATAK, CAV21, V937                  | NO | Mono  | NO            | NO           | NO | Melanoma                                                                                                                                                                                | 16  | 2   | IT           | NCT01636882 | N/A                                                                            |
| Enterovirus | Coxsackie Virus A21, CAVATAK, CAV21, V937                  | NO | Combo | Ipilimumab    | NO           | NO | Uveal melanoma, liver metastases                                                                                                                                                        | 11  | 1   | IV           | NCT03408587 | N/A                                                                            |
| Enterovirus | Coxsackie Virus A21, CAVATAK, CAV21, V937                  | NO | Mono  | NO            | NO           | NO | Stage IV Melanoma                                                                                                                                                                       | 9   | 1   | IT           | NCT00438009 | N/A                                                                            |
| Enterovirus | Coxsackie Virus A21, CAVATAK, CAV21, V937                  | NO | Mono  | NO            | NO           | NO | Melanoma, breast cancer, prostate cancer                                                                                                                                                | 8   | 1   | IV           | NCT00636558 | N/A                                                                            |
| Enterovirus | Coxsackie Virus A21, CAVATAK, CAV21, V937                  | NO | Mono  | NO            | NO           | NO | Malignant melanoma                                                                                                                                                                      | 57  | 2   | IT           | NCT01227551 | N/A                                                                            |
| Enterovirus | Coxsackie Virus A21, CAVATAK, CAV21, V937                  | NO | Combo | Pembrolizumab | NO           | NO | NSCLC, bladder cancer                                                                                                                                                                   | 85  | 1   | IV           | NCT02043665 | https://cancerres.aacrjournals.org/content/77/13_Supplement/CT115              |
| Enterovirus | Coxsackie Virus A21, CAVATAK, CAV21, V937                  | NO | Combo | Pembrolizumab | NO           | NO | Neoplasm metastasis                                                                                                                                                                     | 185 | 1/2 | IT           | NCT04521621 | N/A                                                                            |
| Enterovirus | Coxsackie Virus A21, CAVATAK, CAV21, V937                  | NO | Combo | Pembrolizumab | NO           | NO | Advanced, metastatic melanoma                                                                                                                                                           | 135 | 2   | IV/IT        | NCT04152863 | N/A                                                                            |
| Enterovirus | Coxsackie Virus A21, CAVATAK, CAV21, V937                  | NO | Combo | Pembrolizumab | Vibostolimab | NO | Melanoma                                                                                                                                                                                | 65  | 1/2 | IT           | NCT04303169 | N/A                                                                            |
| Enterovirus | Polyovirus (chimeric polio-rhino viruses - PVSRIPO)        | NO | Mono  | NO            | NO           | NO | Invasive breast cancer                                                                                                                                                                  | 6   | 1   | IT           | NCT03564782 | N/A                                                                            |
| Enterovirus | Polyovirus (chimeric polio-rhino viruses - PVSRIPO)        | NO | Mono  | NO            | NO           | NO | Malignant glioma                                                                                                                                                                        | 122 | 2   | IT           | NCT02986178 | N/A                                                                            |
| Enterovirus | Polyovirus (chimeric polio-rhino viruses - PVSRIPO)        | NO | Mono  | NO            | NO           | NO | Unresectable melanoma                                                                                                                                                                   | 18  | 1   | IT           | NCT03712358 | doi.org/10.1136/jitc-2020-002203                                               |
| Enterovirus | Polyovirus (chimeric polio-rhino viruses - PVSRIPO)        | NO | Mono  | NO            | NO           | NO | Melanoma                                                                                                                                                                                | 56  | 2   | IT           | NCT04577807 | N/A                                                                            |
| Enterovirus | Polyovirus (chimeric polio-rhino viruses - PVSRIPO)        | NO | Combo | Pembrolizumab | NO           | NO | Glioblastoma, recurrent glioblastoma, supratentorial glioblastoma, brain tumors                                                                                                         | 30  | 2   | IT           | NCT04479241 | N/A                                                                            |

|                         |                                                                                                                    |        |       |                              |                                |           |                                                                                                                                                                                                                                                                          |     |     |              |             |                                                                              |
|-------------------------|--------------------------------------------------------------------------------------------------------------------|--------|-------|------------------------------|--------------------------------|-----------|--------------------------------------------------------------------------------------------------------------------------------------------------------------------------------------------------------------------------------------------------------------------------|-----|-----|--------------|-------------|------------------------------------------------------------------------------|
| Enterovirus             | Polyovirus (chimeric polio-rhino viruses - PVSRIPO)                                                                | NO     | Mono  | NO                           | NO                             | NO        | Malignant glioma, anaplastic ssstocytoma, anaplastic oligoastrocytoma, anaplastic oligodendroglioma, glioblastoma, gliosarcoma, atypical reratoid/rhabdoid tumor of brain, medulloblastoma, ependymoma, pleomorphic xanthoastrocytoma of brain, embryonal tumor of brain | 12  | 1   | IT           | NCT03043391 | N/A                                                                          |
| Enterovirus             | Polyovirus (chimeric polio-rhino viruses - PVSRIPO)                                                                | NO     | Mono  | NO                           | NO                             | NO        | Glioma, glioblastoma, malignant glioma, GBB                                                                                                                                                                                                                              | 61  | 1   | IT           | NCT01491893 | doi.org/10.1158/2159-8290.CD-NB2018-098                                      |
| Newcastle disease virus | NDV (73T strain)                                                                                                   | NO     | Combo | Autologous tumor cell lysate | NO                             | NO        | Stage II metastatic melanoma (AJCC stage III)                                                                                                                                                                                                                            | 83  | 2   | NA           | N/A         | doi.org/10.1007/BF02987752; PMID: 9990864                                    |
| Newcastle disease virus | NDV (73T strain)                                                                                                   | NO     | Combo | Autologous tumor cell lysate | IL-2                           | IFN-alpha | Locally advanced renal cell carcinoma                                                                                                                                                                                                                                    | 208 | 2   | NA           | N/A         | doi.org/10.1007/BF00184874                                                   |
| Newcastle disease virus | An attenuated oncolytic veterinary vaccine strain (MTH-68/H)                                                       | NO     | Mono  | NO                           | NO                             | NO        | Various advanced chemorefractory cancers, lung metastases                                                                                                                                                                                                                | 59  | 2   | Inhalation   | NCT00348842 | PMID: 8275514                                                                |
| Newcastle disease virus | Oncolytic veterinary vaccine strain (MTH-68/H)                                                                     | NO     | Mono  | NO                           | NO                             | NO        | GBM, high-grade glioma                                                                                                                                                                                                                                                   | 4   | N/A | NA           | N/A         | doi.org/10.1023/b:neon.0000021735.85511.05                                   |
| Newcastle disease virus | NDV (HUJ strain)                                                                                                   | NO     | Mono  | NO                           | NO                             | NO        | GBM                                                                                                                                                                                                                                                                      | 14  | 1/2 | IV           | NCT01174537 | doi.org/ 10.1016/j.ymthe.2005.08.016                                         |
| Newcastle disease virus | NDV-modified autologous melanoma cell lysate                                                                       | NO     | Combo | Autologous tumor cell lysate | IL-2                           | NO        | Melanoma                                                                                                                                                                                                                                                                 | 29  | 1   | Intradermal  | N/A         | doi.org/10.1046/j.1610-0387.2003.02014.x                                     |
| Newcastle disease virus | NDV (PV701 strain)                                                                                                 | NO     | Mono  | NO                           | NO                             | NO        | Advanced solid tumors                                                                                                                                                                                                                                                    | 79  | 1   | IV           | N/A         | doi.org/ 10.1200/JCO.2002.08.042                                             |
| Newcastle disease virus | NDV (PV701 strain)                                                                                                 | NO     | Mono  | NO                           | NO                             | NO        | Advanced solid tumors                                                                                                                                                                                                                                                    | 18  | 1   | IV           | N/A         | doi.org/ 10.1158/1078-0432.CCR-06-1817                                       |
| Newcastle disease virus | NDV (PV701 strain)                                                                                                 | NO     | Mono  | NO                           | NO                             | NO        | Incurable solid tumors                                                                                                                                                                                                                                                   | 16  | 1   | IV           | N/A         | doi.org/10.1158/1078-0432.CCR-05-2038                                        |
| Newcastle disease virus | Autologous tumor cell vaccine ATV-NDV                                                                              | NO     | Combo | Autologous tumor cells       | NO                             | NO        | Colorectal carcinoma Dukes'                                                                                                                                                                                                                                              | 16  | 1   | Intradermal  | N/A         | doi.org/10.1002/1097-0142(19901001)66:7<1517::aid-cnrcr2820660714>3.0.co;2-i |
| Newcastle disease virus | Autologous tumor cell vaccine ATV-NDV                                                                              | NO     | Combo | Autologous tumor cells       | NO                             | NO        | Early breast cancer, metastatic breast cancer, metastatic ovarian cancer                                                                                                                                                                                                 | 121 | 1   | Intradermal  | N/A         | doi.org/10.1200/JCO.1997.15.4.1354                                           |
| Newcastle disease virus | Autologous tumor cell vaccine ATV-NDV                                                                              | NO     | Combo | Autologous tumor cells       | IL-2                           | NO        | HNSCC                                                                                                                                                                                                                                                                    | 20  | 1   | Intradermal  | N/A         | doi.org/10.1158/0008-5472.CAN-04-1545                                        |
| Newcastle disease virus | Autologous tumor cell vaccine ATV-NDV (avirulent strain Ulster of NDV)                                             | NO     | Combo | Autologous tumor cells       | Bacillus Calmette Gudrin (BCG) | NO        | Colorectal resected carcinoma                                                                                                                                                                                                                                            | 57  | 2   | Intradermal  | N/A         | PMID: 9816085                                                                |
| Newcastle disease virus | Autologous tumor cell vaccine ATV-NDV                                                                              | NO     | Combo | Autologous tumor cells       | IFN-alpha                      | NO        | Renal cell cancer patients                                                                                                                                                                                                                                               | 40  | 2   | Intradermal  | N/A         | doi.org/10.3892/ijo.6.5.947                                                  |
| Newcastle disease virus | Autologous tumor cell vaccine ATV-NDV                                                                              | NO     | Combo | Autologous tumor cells       | NO                             | NO        | GBM                                                                                                                                                                                                                                                                      | 111 | 2   | Intradermal  | N/A         | doi.org/10.1200/JCO.2004.09.038                                              |
| Newcastle disease virus | Autologous tumor cell vaccine ATV-NDV                                                                              | NO     | Combo | Autologous tumor cells       | NO                             | NO        | Colorectal cancer                                                                                                                                                                                                                                                        | 50  | 3   | Intradermal  | N/A         | doi.org/10.1007/s00262-008-0526-1<br>doi.org/10.1586/14760584.2014.854169    |
| Newcastle disease virus | Autologous tumor cell vaccine ATV-NDV                                                                              | NO     | Combo | Autologous tumor cells       | NDV-specific biAbs             | NO        | Colorectal resected carcinoma                                                                                                                                                                                                                                            | 51  | 1   | Intradermal  | N/A         | doi.org/10.1007/s00262-008-0526-1                                            |
| Newcastle disease virus | MEDI5395                                                                                                           | GM-CSF | Combo | Durvalumab                   | NO                             | NO        | Advanced solid tumors                                                                                                                                                                                                                                                    | 188 | 1   | NA           | NCT03889275 | doi.org/10.1158/1538-7445.AM2020-CT244                                       |
| Newcastle disease virus | MEDI9253                                                                                                           | IL-12  | Combo | Durvalumab                   | NO                             | NO        | Solid tumors                                                                                                                                                                                                                                                             | 86  | 1   | NA           | NCT04613492 | N/A                                                                          |
| Measles virus           | The unmodified commercially available MV-Edm-Zagreb vaccine strain (MV-EZ)                                         | NO     | Combo | IFN-alpha                    | NO                             | NO        | Cutaneous T-cell lymphoma IIb or higher, resistant to or relapsing after conventional therapies                                                                                                                                                                          | 5   | 1   | IT           | N/A         | doi.org/10.1182/blood-2004-11-4558                                           |
| Measles virus           | MV-CEA virus (oncolytic MV-Edm derivatives genetically engineered to expressed the human carcinoembryonic antigen) | CEA    | Mono  | NO                           | NO                             | NO        | Taxol- and platinum-resistant ovarian cancer                                                                                                                                                                                                                             | 21  | 1   | IP           | N/A         | doi.org/10.1158/0008-5472.CAN-09-2762                                        |
| Measles virus           | MV-NIS virus (oncolytic MV-Edm derivatives genetically engineered to expressed the human sodium iodide symporter)  | hNIS   | Combo | Chemotherapy                 | NO                             | NO        | Relapsed and refractory MM                                                                                                                                                                                                                                               | 32  | 1   | IV           | N/A         | doi.org/10.1038/leu.2017.120                                                 |
| Measles virus           | MV-NIS virus (oncolytic MV-Edm derivatives genetically engineered to expressed the human sodium iodide symporter)  | hNIS   | Mono  | NO                           | NO                             | NO        | Taxol- and platinum-resistant ovarian cancer                                                                                                                                                                                                                             | 16  | 1   | IP           | N/A         | doi.org/10.1158/0008-5472.CAN-14-2533                                        |
| Measles virus           | MV-NIS virus (oncolytic MV-Edm derivatives genetically engineered to expressed the human sodium iodide symporter)  | hNIS   | Mono  | NO                           | NO                             | NO        | Ovarian, fallopian or peritoneal Cancer                                                                                                                                                                                                                                  | 66  | 2   | IP           | NCT02364713 | doi.org/10.2174/1568009617666170222125035                                    |
| Measles virus           | MV-NIS virus (oncolytic MV-Edm derivatives genetically engineered to expressed the human sodium iodide symporter)  | hNIS   | Combo | Autologous MSC               | NO                             | NO        | Recurrent ovarian, primary peritoneal or fallopian tube cancer                                                                                                                                                                                                           | 57  | 1/2 | IP           | NCT02068794 | N/A                                                                          |
| Measles virus           | MV-NIS virus (oncolytic MV-Edm derivatives genetically engineered to expressed the human sodium iodide symporter)  | hNIS   | Mono  | NO                           | NO                             | NO        | Malignant peripheral nerve sheath tumor                                                                                                                                                                                                                                  | 30  | 1   | IT           | NCT02700230 | N/A                                                                          |
| Measles virus           | MV-NIS virus (oncolytic MV-Edm derivatives genetically engineered to expressed the human sodium iodide symporter)  | hNIS   | Mono  | NO                           | NO                             | NO        | Malignant pleural mesothelioma                                                                                                                                                                                                                                           | 15  | 1   | Intrapleural | NCT01503177 | N/A                                                                          |

|                                           |                                                                                                                    |      |       |              |    |    |                                                                                       |    |     |       |             |                                     |
|-------------------------------------------|--------------------------------------------------------------------------------------------------------------------|------|-------|--------------|----|----|---------------------------------------------------------------------------------------|----|-----|-------|-------------|-------------------------------------|
| Measles virus                             | MV-NIS virus (oncolytic MV-Edm derivatives genetically engineered to expressed the human sodium iodide symporter)  | hNIS | Mono  | NO           | NO | NO | Recurrent/Metastatic SCC of the head and neck, metastatic breast cancer               | 12 | 1   | IT    | NCT01846091 | N/A                                 |
| Measles virus                             | MV-CEA virus (oncolytic MV-Edm derivatives genetically engineered to expressed the human carcinoembryonic antigen) | CEA  | Mono  | NO           | NO | NO | GBM                                                                                   | 23 | 1   | IT    | NCT00390299 | N/A                                 |
| Others (Parvovirus , SVV)                 | Seneca Valley Virus (SVV-001, NTX-010)                                                                             | NO   | Mono  | NO           | NO | NO | Advanced solid tumors with neuroendocrine features, SCLC                              | 30 | 1   | IV    | NCT00314925 | doi.org/10.2147/OV.S96915           |
| Others (Parvovirus , Seneca Valley virus) | Seneca Valley Virus (SVV-001, NTX-010)                                                                             | NO   | Combo | Chemotherapy | NO | NO | Pediatric patients with neuroblastoma, rhabdomyosarcoma, rare tumors with NET feature | 22 | 1   | IV    | NCT01048892 | doi.org/10.2147/OV.S96915           |
| Others (Parvovirus , SVV)                 | Seneca Valley Virus (SVV-001, NTX-010)                                                                             | NO   | Mono  | NO           | NO | NO | Patients with SCLC who did not progress after platinum-based chemotherapy             | 26 | 2   | IV    | NCT01017601 | doi.org/10.1016/j.jtho.2019.09.083  |
| Others (Parvovirus , SVV)                 | H-1PV (ParvOryx®)                                                                                                  | NO   | Mono  | NO           | NO | NO | Glioblastoma                                                                          | 18 | 1/2 | IT    | NCT01301430 | doi.org/10.1016/j.ymthe.2017.08.016 |
| Others (Parvovirus , SVV)                 | H-1PV (ParvOryx®)                                                                                                  | NO   | Mono  | NO           | NO | NO | Pancreatic carcinoma                                                                  | 7  | 1/2 | IV/IT | NCT02653313 | N/A                                 |
